# Supplementary material for: Upconversion Emission Studies in Er3+/Yb3+ Doped/Co-Doped NaGdF4 Phosphor Particles for Intense Cathodoluminescence and Wide Temperature-Sensing Applications
Source: MDPI journal article supplement (doi:10.3390/ma15196563), 2022-09-21
Supplement: s1 [file s1]

## Supporting information

### Upconversion emission studies in $\text{Er}^{3+}/\text{Yb}^{3+}$ doped/codoped $\text{NaGdF}_4$ phosphor particles for intense Cathodoluminescence and wide range temperature sensing applications

A. Kumar<sup>1,\*</sup>, H. Couto<sup>2</sup> and Joaquim C.G. Esteves da Silva<sup>1</sup>

<sup>1</sup> Research Centre in Chemistry (CIQUP), Departamento de Geociências, Ambiente e Ordenamento do Território, Faculdade de Ciências, Universidade do Porto, rua do Campo Alegre s/n, 4169–007 Porto, Portugal

<sup>2</sup> Instituto de Ciências da Terra – Pólo Porto, Departamento de Geociências, Ambiente e Ordenamento do Território, Faculdade de Ciências, Universidade do Porto, rua do Campo Alegre s/n, 4169–007 Porto, Portugal

\* Correspondence: hcouto@fc.up.pt

Table S1: 980nm Pump power excitation dependent CIE colour co-ordinates and colour purities

| S. No. | Pump Power (mW) | CIE-X  | CIE-Y  | Purity (%) |
|--------|-----------------|--------|--------|------------|
| 1      | 100             | 0.3381 | 0.3352 | 2.0        |
| 2      | 300             | 0.3604 | 0.3643 | 17.5       |
| 3      | 400             | 0.3640 | 0.3766 | 22.2       |
| 4      | 600             | 0.3683 | 0.4101 | 33.6       |
| 5      | 800             | 0.3636 | 0.4405 | 41.4       |
| 6      | 1000            | 0.3562 | 0.4607 | 45.4       |
| 7      | 1200            | 0.3458 | 0.4804 | 48.3       |
| 8      | 1400            | 0.3334 | 0.4993 | 50.4       |
| 9      | 1600            | 0.3268 | 0.5080 | 51.1       |
| 10     | 1800            | 0.3211 | 0.5189 | 52.8       |
| 11     | 2000            | 0.3146 | 0.5279 | 53.8       |
| 12     | 2200            | 0.3149 | 0.5286 | 54.0       |
